# Supplementary material for: Fabrication of an MOF-derived heteroatom-doped Co/CoO/carbon hybrid with superior sodium storage performance for sodium-ion batteries
Source: Royal Society of Chemistry journal article supplement (doi:10.1039/c7ta03939e), 2017-01-01
Supplement: c7ta03939e1.pdf [file c7ta03939e1.pdf]

## **Supporting Information**

# **Fabrication of MOF-derived Heteroatom-doped Co/CoO/Carbon Hybrid with Superior Sodium Storage Performance for Sodium-ion Batteries**

Yusuf Valentino Kaneti,<sup>1\*+</sup> Jun Zhang,<sup>2,3+</sup> Yan-Bing He,<sup>3\*</sup> Zhijie Wang,<sup>5</sup> Shunsuke Tanaka,<sup>1,6</sup> Md. Shahriar A. Hossain,<sup>1,6</sup> Zheng-Ze Pan,<sup>3</sup> Bin Xiang,<sup>5</sup> Quan-Hong Yang,<sup>2,3,4\*</sup> Yusuke Yamauchi<sup>1,6\*</sup>

- 1 International Center for Materials Nanoarchitectonics (MANA), National Institute for Materials Science (NIMS), 1-1 Namiki, Tsukuba, Ibaraki 305-0044, Japan
- 2 Tsinghua-Berkeley Shenzhen Institute (TBSI), Tsinghua University, Shenzhen 518055, China.
- 3 Shenzhen Key Laboratory for Graphene-based Materials and Engineering Laboratory for Functionalized Carbon Materials, Graduate School at Shenzhen, Tsinghua University, Shenzhen 518055, China.
- 4 School of Chemical Engineering and Technology, Tianjin University, Tianjin 300072, China.
- 5 Department of Materials Science & Engineering, CAS Key Lab of Materials for Energy Conversion, Synergetic Innovation Center of Quantum Information Quantum Physics, University of Science and Technology of China, Hefei, Anhui 230026, China.
- 6 Australian Institute of Innovative Materials (AIIM), University of Wollongong, North Wollongong, New South Wales 2500, Australia.

+ Equally contributed to this work

### **E-mails:**

[KANETI.Valentino@nims.go.jp](mailto:KANETI.Valentino@nims.go.jp);

[he.yanbing@sz.tsinghua.edu.cn](mailto:he.yanbing@sz.tsinghua.edu.cn);

[qhyangcn@tju.edu.cn](mailto:qhyangcn@tju.edu.cn);

[yusuke@uow.edu.au](mailto:yusuke@uow.edu.au)

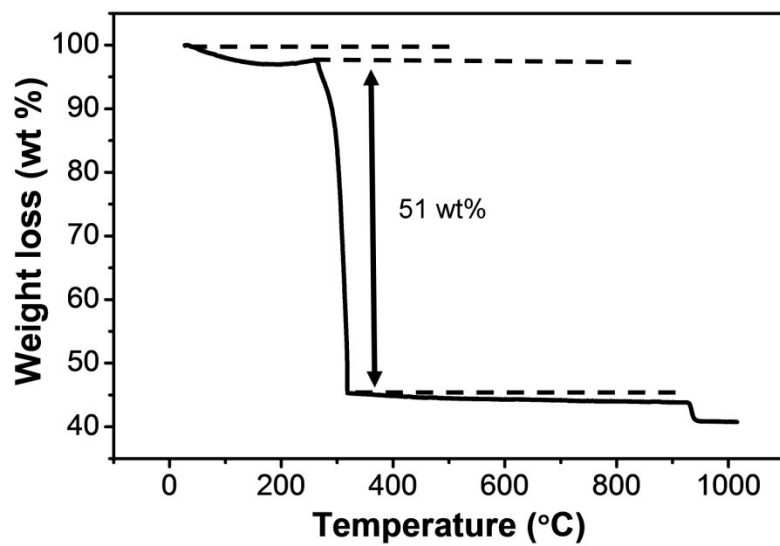

**Fig. S1.** TGA curve of the Ni-doped Co/CoO/N-doped carbon (NC) carried out under air atmosphere at a heating rate of  $10\text{ }^{\circ}\text{C}\cdot\text{min}^{-1}$ .
